# Supplementary material for: Consensus practice guidelines on interventions for lumbar facet joint pain from a multispecialty, international working group
Source: PubMed Central journal article supplement — Reg Anesth Pain Med. 2020 Apr 3;45(6):424–67. doi: 10.1136/rapm-2019-101243 (PMC7362874; doi:10.1136/rapm-2019-101243), 2020-04-03
Supplement: rapm-2019-101243supp001.pdf [file rapm-2019-101243supp001.pdf]

**Appendix A.** Groups and representatives participating in the Lumbar Facet Joint Pain Guidelines Committee

| Society                                                   |      | Participating Representatives         |
|-----------------------------------------------------------|------|---------------------------------------|
| American Academy of Pain Medicine                         | AAPM | Michael Hooten, Robert Hurley         |
| American Pain Society                                     | APS  | Mark Wallace, Shuchita Garg           |
| American Society of Anesthesiology                        | ASA  | Asokumar Buvanendran, Kevin Vorenkamp |
| American Society of Pain & Neuroscience                   | ASPN | Tim Deer                              |
| American Society of Regional Anesthesia and Pain Medicine | ASRA | Steven P. Cohen, Samer Narouze        |
| British Pain Society                                      | BPS  | Arun Bhaskar                          |
| Canadian Pain Society                                     | CPS  | Anuj Bhatia                           |
| International Neuromodulation Society                     | INS  | Tim Deer                              |
| Korean Pain Society                                       | KPS  | Jee Youn Moon                         |
| North American Neuromodulation Society                    | NANS | David Provenzano, Todd Sitzman        |
| Spine Intervention Society                                | SIS  | DJ Kennedy, Matt Smuck                |
| U.S. Dept. of Defense                                     | DoD  | Brian McLean                          |
| U.S. Dept. of Veterans Affairs                            | VA   | Sanjog Pangarkar, Zirong Zhou         |
| World Institute of Pain                                   | WIP  | Rick Rauck, Jan Van Zundert           |
